# Supplementary material for: ChinaSoyArea10m: a dataset of soybean-planting areas with a spatial resolution of 10 m across China from 2017 to 2021
Source: Copernicus journal article supplement (doi:10.5194/essd-16-3213-2024), 2024-07-10
Supplement: Supplementary file 1 [file essd-16-3213-2024-supplement.pdf]

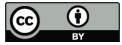

*Supplement of*

## **ChinaSoyArea10m: a dataset of soybean-planting areas with a spatial resolution of 10 m across China from 2017 to 2021**

**Qinghang Mei et al.**

*Correspondence to:* Zhao Zhang (zhangzhao@bnu.edu.cn)

The copyright of individual parts of the supplement might differ from the article licence.

8 **Supplementary Figures**

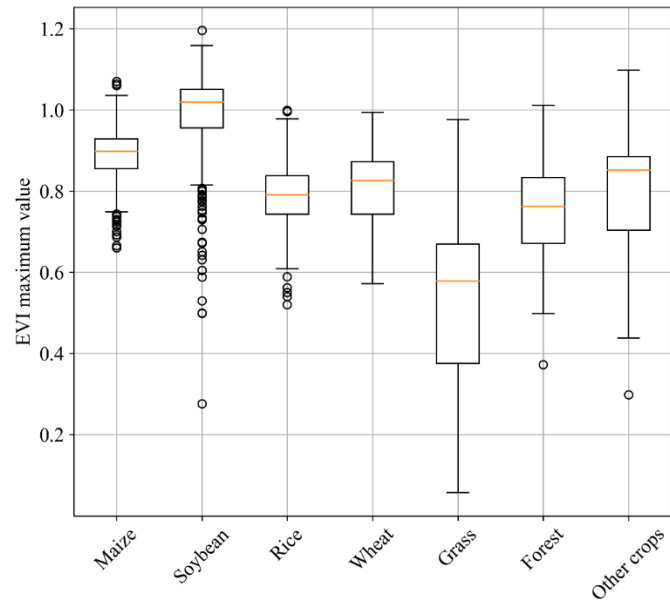

9

10 **Figure S1. Box plot of the EVI maximum in 2019 based on all ground samples.**

11

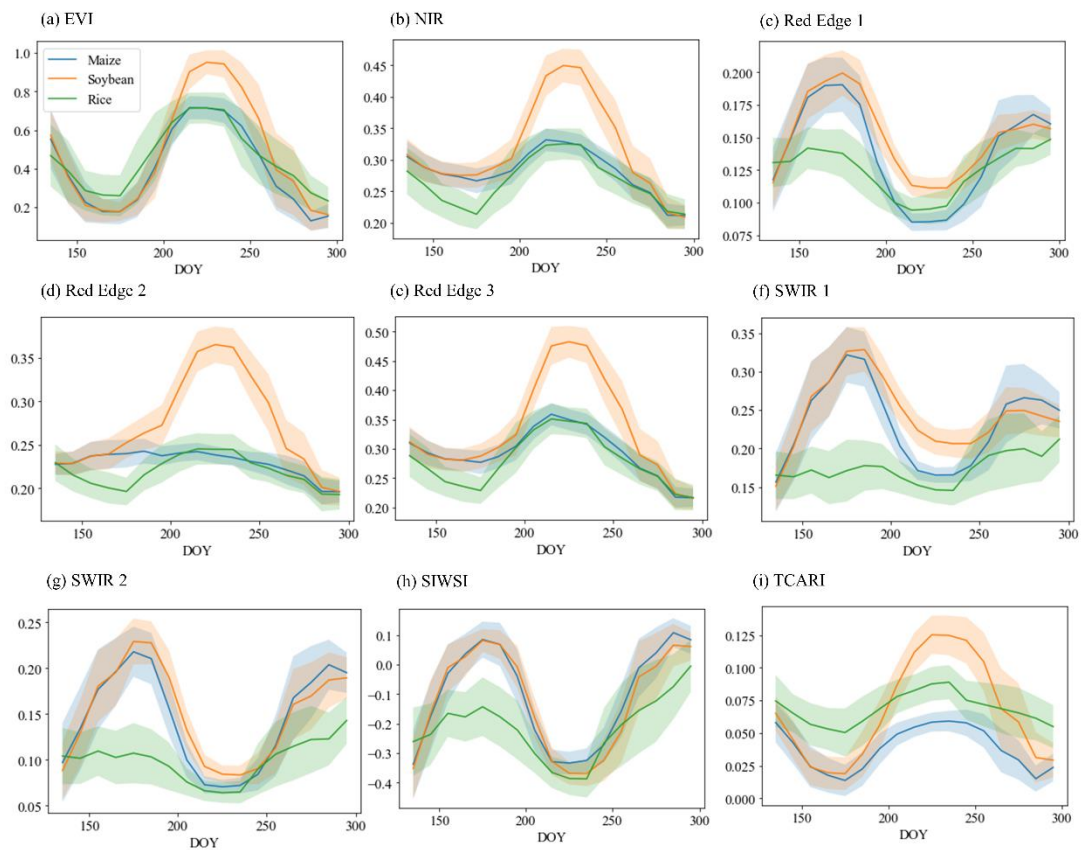

12

13 **Figure S2. Temporal profiles of (a-i) for major crops in Zone II.**

14

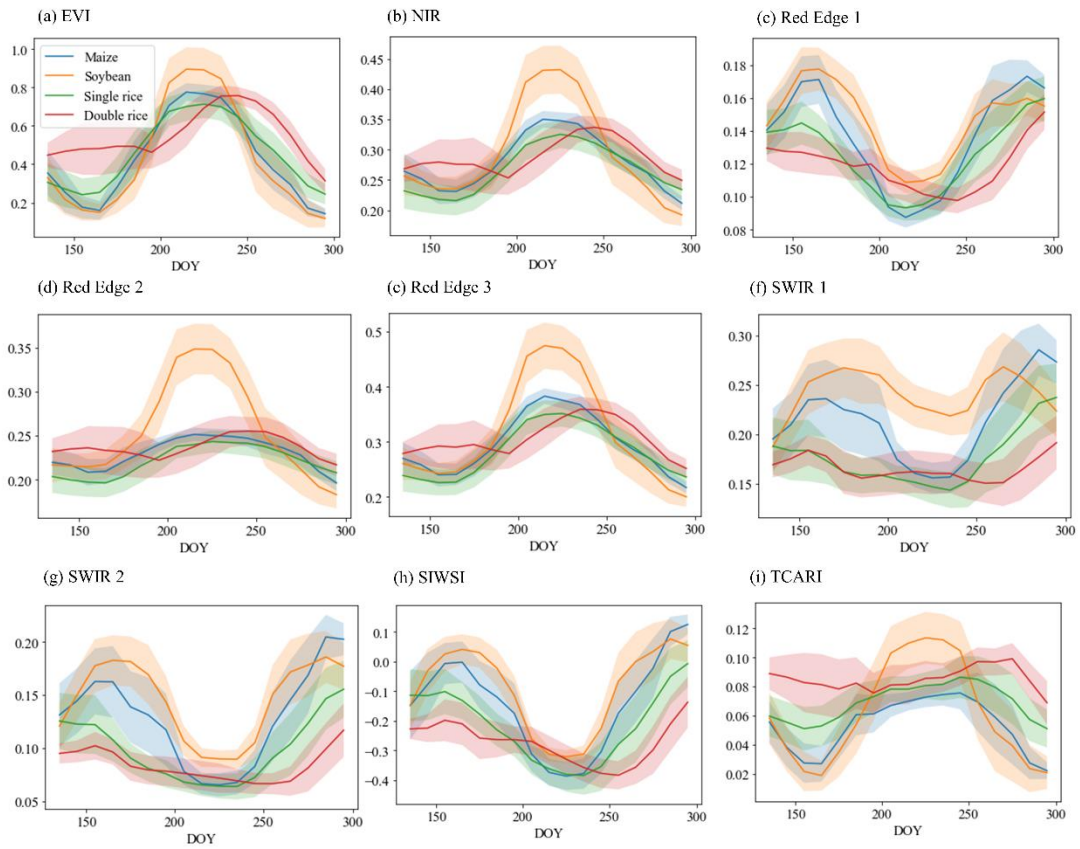

15

16 **Figure S3. Temporal profiles of (a-i) for major crops in Zone III.**

17

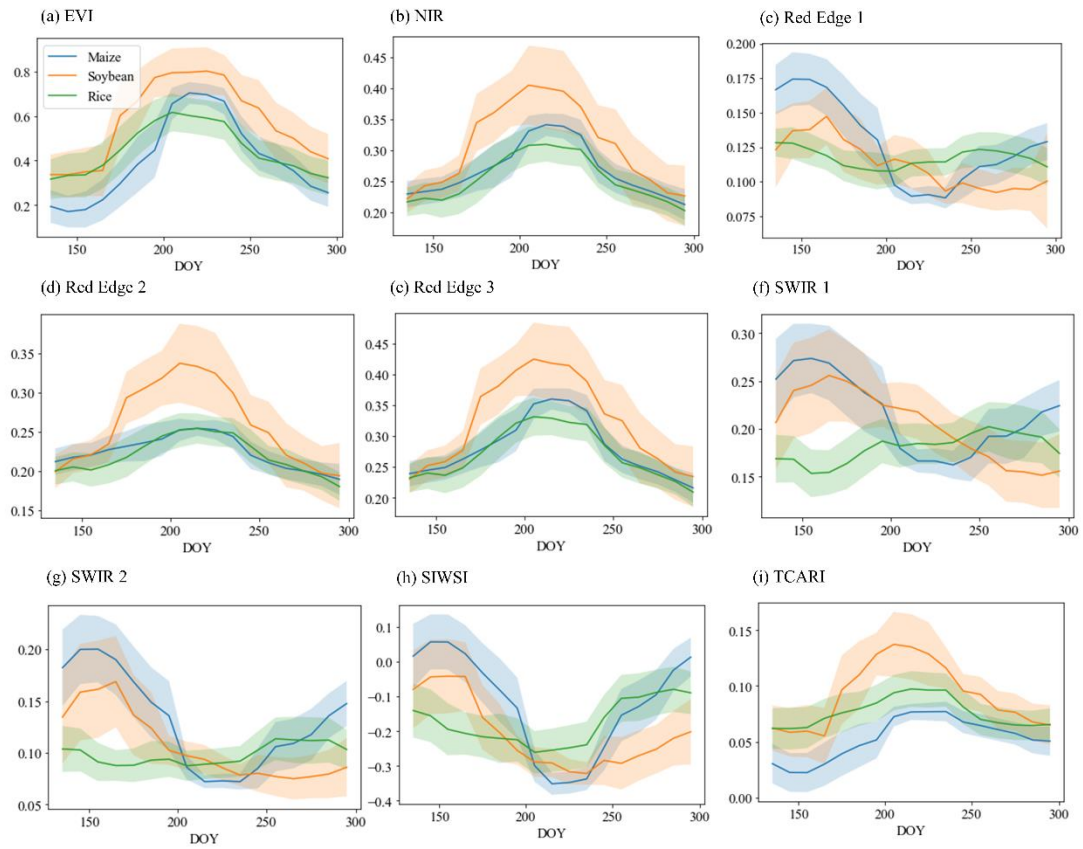

18

19 **Figure S4. Temporal profiles of (a-i) for major crops in Zone IV.**

20

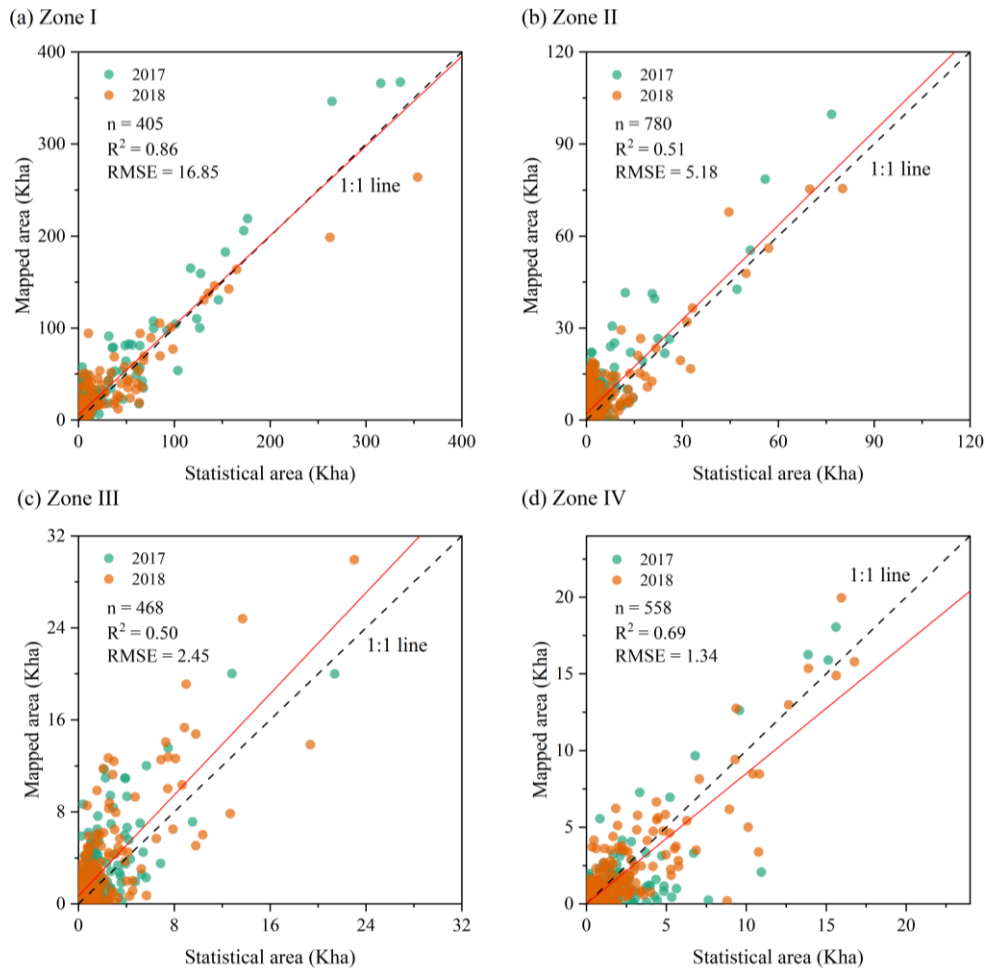

21

22 **Figure S5. Comparison of soybean areas with county-level statistics in (a) Zone I, (b) Zone II, (c) Zone III,**

23 **and (d) Zone IV in 2017 and 2018.**

24

25 **Supplementary Table**

26

**Table S1. Confusion matrix of the soybean maps in each sub-zone in 2019.**

|     | Reference   | Map     |             | Producer's Accuracy | User's Accuracy | F1 Score | Overall Accuracy |
|-----|-------------|---------|-------------|---------------------|-----------------|----------|------------------|
|     |             | Soybean | Non-Soybean |                     |                 |          |                  |
| I   | Soybean     | 922     | 122         | 88.31%              | 81.09%          | 0.85     | 87.12%           |
|     | Non-Soybean | 215     | 1358        | 86.33%              | 91.76%          | 0.89     |                  |
| II  | Soybean     | 233     | 74          | 75.90%              | 86.30%          | 0.81     | 83.58%           |
|     | Non-Soybean | 37      | 332         | 89.97%              | 81.77%          | 0.86     |                  |
| III | Soybean     | 101     | 26          | 79.53%              | 98.06%          | 0.88     | 90.67%           |
|     | Non-Soybean | 2       | 171         | 98.84%              | 86.80%          | 0.92     |                  |
| IV  | Soybean     | 23      | 13          | 63.89%              | 92.00%          | 0.75     | 87.18%           |
|     | Non-Soybean | 2       | 79          | 97.53%              | 85.87%          | 0.91     |                  |

27
